# Supplementary material
Source: Springer Nature journal article supplement (https://www.springermedizin.de/resource/supplementary/12936_2013_3023_MOESM7_ESM.pdf/9544856)

500nM

50nM

5nM

0.5nM

DMSO

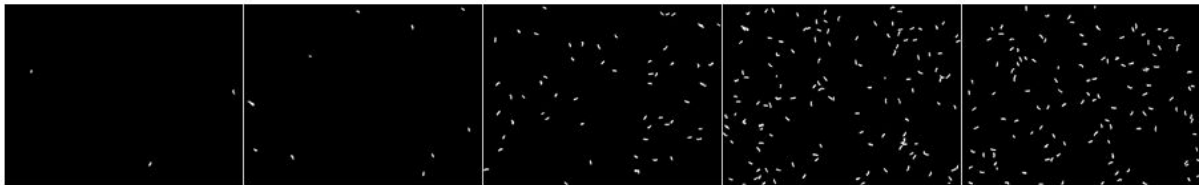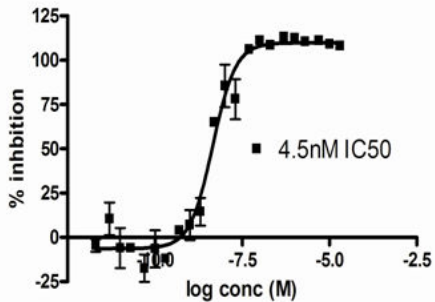

Supplement: MOESM7 [file 9544856]
